# Supplementary material
Source: publisher site journal article supplement (https://www.dovepress.com/get_supplementary_file.php?f=451766.docx)
Supplement: Supplementary file 1 [file get_supplementary_file.php]

**Table S1 Interview Questions**

| 1. What is your understanding of patient safety events? Could you talk about specific patient safety events that you have experienced? How did you feel when it happened? |
| --- |
| 2. How do the patient safety events affect your psychological, physical and professional state over time? |
| 3. What do you worry about most after patient safety events? |
| 4. How did you respond to a patient safety event? |
| 5. What is your hospital’s attitude after a patient safety event? Has there been any intervention? If so, what measures have been taken? |
| 6. Is there anything else you want to talk about? |

**Table S2 Basic characteristic of the participants (n=406)**

| Variable | n(%) |
| --- | --- |
| Gender |  |
| Female | 385(94.83) |
| Male | 21(5.17) |
| *t* |  |
| *P* |  |
| Age |  |
| 20-30 | 183(45.07) |
| 31-40 | 157(38.67) |
| 41-50 | 52(12.81) |
| ≥51 | 14(3.45) |
| *F* |  |
| *P* |  |
| Marital status |  |
| Unmarried | 149(36.70) |
| Married | 250(61.58) |
| Divorced | 7(1.72) |
| *F/Z* |  |
| *P* |  |
| Number of children | |
| 0 | 180(44.33) |
| 1 | 115(28.33) |
| ≥2 | 111(27.34) |
| *F* |  |
| *P* |  |
| Education level |  |
| College degree or below | 47(11.38) |
| College degree | 348(85.71) |
| Master degree or above | 14(3.45) |
| *F* |  |
| *P* |  |
| Monthly income(CNY) | |
| ＜5000 | 68(16.75) |
| 5000-7000 | 152(37.44) |
| 7001-9000 | 97(23.89) |
| ＞9000 | 89(21.92) |
| *F* |  |
| *P* |  |
| Unit types |  |
| Medical | 100(24.63) |
| Surgical | 102(25.12) |
| Obstetrics and gynecology | 30(7.39) |
| Operating room | 50(12.32) |
| Pediatrics | 16(3.94) |
| Emergency room | 20(4.93) |
| ICU | 10(2.46) |
| Others | 78(19.21) |
| *F* |  |
| *P* |  |
| Length of working(years) | |
| ＜5 | 121(29.8) |
| 5-10 | 117(28.82) |
| 11-15 | 83(20.44) |
| 16-20 | 32(7.88) |
| ＞20 | 53(13.05) |
| *F* |  |
| *P* |  |
| Positional titles |  |
| Nurse | 72(17.73) |
| Senior nurse | 132(32.51) |
| supervisor nurse | 166(40.89) |
| co-chief nurse | 33(8.13) |
| chief nurse | 3(0.74) |
| *F* |  |
| *P* |  |
| Hours worked per week in the last 3 months(h) |  |
| ≤40 | 215(52.96) |
| 41-50 | 160(39.41) |
| 51-60 | 25(6.16) |
| ＞60 | 6(1.48) |
| *F* |  |
| *P* |  |
| Average number of night shifts per month in recent 3 month |  |
| 0 | 100(24.63) |
| 1-5 | 254(62.56) |
| 6-10 | 52(12.81) |
| *F* |  |
| *P* |  |

**Table S3 The result of linear regression analysis of psychological distress influencing factors**

| Independent variable | b | SE | β | t | P |
| --- | --- | --- | --- | --- | --- |
| (Constant) | 12.062 | 1.795 |  | 6.719 | 0 |
| Sex | 0.958 | 0.84 | 0.057 | 1.141 | 0.255 |
| Age | 0.867 | 0.486 | 0.187 | 1.783 | 0.075 |
| Marital status | 0.539 | 0.472 | 0.074 | 1.141 | 0.254 |
| Monthly income | 0.244 | 0.203 | 0.066 | 1.202 | 0.230 |
| Unit types | -0.205 | 0.072 | -0.142 | -2.836 | **0.005*** |
| Length of working | -0.372 | 0.323 | -0.133 | -1.152 | 0.250 |
| Positional titles | 0.083 | 0.368 | 0.02 | 0.226 | 0.821 |

Noted:* P＜0.05.

**Table S4** **The result of linear regression analysis of physical distress influencing factors**

| Independent variable | b | SE | β | t | P |
| --- | --- | --- | --- | --- | --- |
| (Constant) | 9.299 | 1.35 |  | 6.887 | 0 |
| Number of children | -0.183 | 0.197 | -0.046 | -0.931 | 0.352 |
| Education | 0.16 | 0.441 | 0.018 | 0.362 | 0.717 |

**Table S5 The result of linear regression analysis of practice distress influencing factors**

| Independent variable | b | SE | β | t | P |
| --- | --- | --- | --- | --- | --- |
| (Constant) | 17.127 | 0.908 |  | 18.866 | 0 |
| Age | 0.233 | 0.65 | 0.038 | 0.359 | 0.720 |
| Marital status | 0.138 | 0.632 | 0.014 | 0.219 | 0.827 |
| Length of working | -0.972 | 0.432 | -0.261 | -2.248 | **0.025*** |
| Positional titles | 0.15 | 0.467 | 0.027 | 0.321 | 0.749 |

Noted:* P＜0.05.

**Table S6 The result of linear regression analysis of management support influencing factors**

| Independent variable | b | SE | β | t | P |
| --- | --- | --- | --- | --- | --- |
| (Constant) | 13.453 | 0.476 |  | 28.282 | 0 |
| Unit types | 0.164 | 0.106 | 0.077 | 1.548 | 0.122 |

**Table S7** **The result of linear regression analysis of colleague support influencing factors**

| Independent variable | b | SE | β | t | P |
| --- | --- | --- | --- | --- | --- |
| (Constant) | 8.94 | 1.18 |  | 7.574 | 0 |
| Sex | -0.906 | 0.536 | -0.084 | -1.69 | 0.092 |
| Age | -0.229 | 0.236 | -0.078 | -0.97 | 0.333 |
| Marital status | -0.482 | 0.362 | -0.104 | -1.332 | 0.184 |
| Number of children | 0.166 | 0.22 | 0.058 | 0.758 | 0.449 |
| Positional titles | -0.02 | 0.209 | -0.008 | -0.097 | 0.922 |

**Table S8 The result of linear regression analysis of nonwork-related support influencing factors**

| Independent variable | b | SE | β | t | P |
| --- | --- | --- | --- | --- | --- |
| (Constant) | 5.99 | 0.91 |  | 6.581 | 0 |
| Sex | -1.097 | 0.434 | -0.126 | -2.526 | 0.012* |
| Monthly income | 0.111 | 0.095 | 0.058 | 1.169 | 0.243 |
| Unit types | 0.061 | 0.037 | 0.082 | 1.631 | 0.104 |

Noted:* P＜0.05.
